# Supplementary material for: Inducible knock-down of GNOM during root formation reveals tissue-specific response to auxin transport and its modulation of local auxin biosynthesis
Source: PubMed Central journal article supplement (PMC3935571; doi:10.1093/jxb/ert475), 2014-01-22
Supplement: supp_ert475_jexbot112813_file001.pdf [file supp_ert475_jexbot112813_file001.pdf]

**Inducible knock-down of GNOM during root formation reveals tissue-specific response to auxin transport and its modulation of local auxin biosynthesis**

*Jingze Guo, Jun Wei, Jian Xu, and Meng-xiang Sun*

**SUPPLEMENTARY MATERIAL**

**Supplementary Table S1. Sequence of RT primers**

|           |                                         |                          |
|-----------|-----------------------------------------|--------------------------|
| At5g25760 | <i>UBC</i>                              | TATTCACTCTCGCAAATCAA     |
| At1g13320 | <i>PP2A subunit A3</i>                  | TACTCTCCAGTGCCTGTCTT     |
| At4g26410 | <i>Expressed unknown protein</i>        | TGCCGAAGTCGTCATC         |
| At4g34270 | <i>TIP41 like</i>                       | CTGGAAGCCTCTGACTGATG     |
| At5g46630 | <i>Clathrin adaptor complex subunit</i> | TGTTGTAACCGCTCTTCTCC     |
|           | Induced antisense <i>GNOM</i>           | AGCGGTTATGAGAAGAAATGTAAG |

**Supplementary Table S2. Sequence of primers for quantitative PCR**

| locus number | gene                                     | primer sequences                                  | product size | primer design  |
|--------------|------------------------------------------|---------------------------------------------------|--------------|----------------|
| AT1G13320    | <i>PROTEIN PHOSPHATASE 2A SUBUNIT A3</i> | GTCCTGGCGTGTGCGTTATATG                            | 90 bp        | J <sup>b</sup> |
|              |                                          | GGCACCAGATCCGTC <sup>^</sup> CTAGTTG <sup>a</sup> |              |                |
| AT4G26410    | <i>Expressed unknown protein</i>         | GATTGGTGTGCTGCTAGTCTC                             | 98 bp        | J              |
|              |                                          | AGAATTGTGC <sup>^</sup> CTCTTCGCTCTG              |              |                |
| AT4G34270    | <i>TIP41 like</i>                        | CTGAGAGTTGATGGTGTGCTTATGAG                        | 141 bp       | J              |
|              |                                          | TGGATACCCTTT <sup>^</sup> CGCAGATAGAGAC           |              |                |
| AT5G25760    | <i>UBC</i>                               | CTGCGACTCAG <sup>^</sup> GGAATCTTCTAA             | 61 bp        | J              |
|              |                                          | TTGTGCCATTGAATTGAACCC                             |              |                |
| AT5G46630    | <i>Clathrin adaptor complex subunit</i>  | CCAAGACCAATTTCCAAGTGACAAC                         | 78 bp        | J              |
|              |                                          | TTCTTATC <sup>^</sup> TTCCAAACCAAGCAATCG          |              |                |
| At1g73590    | <i>PIN1</i>                              | CTGGTCCCTCATTTCCTTCAA <sup>^</sup> GTG            | 116 bp       | J              |
|              |                                          | TGAACAACC <sup>^</sup> CAAGACTGAACATAGC           |              |                |
| At5g57090    | <i>PIN2</i>                              | TCCTCCATATCGCCATCGTTCAG                           | 118 bp       | J              |
|              |                                          | AGCATTCCGAATATAACC <sup>^</sup> GCAGTG            |              |                |
| At1g70940    | <i>PIN3</i>                              | ATGGCGGTTAGGTTCCCTTACGG                           | 134 bp       | S <sup>c</sup> |
|              |                                          | GCAAACACAAAGGGCACAATTCC                           |              |                |
| At2g01420    | <i>PIN4</i>                              | ATCATTGCTTGTGGAACTCTGTC                           | 141 bp       | J              |
|              |                                          | CAACGCAGC <sup>^</sup> CTGAACGATGG                |              |                |
| At1g23080    | <i>PIN7</i>                              | AGTGTGATGACTCGGCTGATATTG                          | 114 bp       | J              |
|              |                                          | ATCCCAC <sup>^</sup> CTGAAAGCAACAAGAG             |              |                |
| At2g36910    | <i>PGP1</i>                              | CCGTTATGATTGGTGGATT <sup>^</sup> GGCATTG          | 134 bp       | J              |
|              |                                          | GGACTCGCTGTTACGCTCTATCG                           |              |                |
| At2g47000    | <i>PGP4</i>                              | GCTTCTCTTCTTCGTCCTCTTCTC                          | 138 bp       | S              |
|              |                                          | ATATCGCCATTGCCGCCATTG                             |              |                |
| At3g28860    | <i>PGP19</i>                             | TTCTCTGCTATTGTTGGTGAAT <sup>^</sup> GAG           | 130 bp       | J              |
|              |                                          | GGTCTTGAATTATCGTCGGTCTCTG                         |              |                |
| At2g38120    | <i>AUX1</i>                              | TGCCCTCCGCTCGTCAG <sup>^</sup> AATG               | 122 bp       | J              |
|              |                                          | CACCGAACCCAAATCCGACTATAAG                         |              |                |
| At1g77690    | <i>LAX3</i>                              | GCCGTCACAGT <sup>^</sup> GGAGATAATGC              | 102 bp       | J              |
|              |                                          | GGATGGTAGCGTTAGCGTTAGTAC                          |              |                |
| At4g13260    | <i>YUCCA2</i>                            | ACTTCAATGCTCTTCTTCTTGTG                           | 188 bp       | S              |
|              |                                          | AACTAACCCCTAACCGATCCGTGTC                         |              |                |
| At1g04610    | <i>YUCCA3</i>                            | AATCATAAAGTTCGGCAAAGGCAAAG                        | 137 bp       | S              |
|              |                                          | CATCATCGGAGAAGAAGTCGTTGTC                         |              |                |
| At5g11320    | <i>YUCCA4</i>                            | CGTTCTTGATGTCGGTGCCATTTT                          | 60 bp        | J              |
|              |                                          | GCTTGCGTCACTTAA <sup>^</sup> TTTGTCTG             |              |                |
| At5g43890    | <i>YUCCA5</i>                            | GGCGAGAAATACAGAGGAAAGAGTG                         | 125 bp       | Without        |

|           |                |                                         |        |                   |
|-----------|----------------|-----------------------------------------|--------|-------------------|
|           |                | ACATGAACCGAGCTACGAACAAC                 |        | intron            |
| At5g25620 | <i>YUCCA6</i>  | AACTTCGGTGCTCAGCCTTCTC                  | 68 bp  | S                 |
|           |                | CCCAACATCTCTCGTGGTAGGAC                 |        |                   |
| At4g28720 | <i>YUCCA8</i>  | GGATTGTATGCGGTTGGGTTTACG                | 83 bp  | Without<br>intron |
|           |                | GAGCCTATGTCTTGTGCGATCTTAAC              |        |                   |
| At1g70560 | <i>TAA1</i>    | CAGACGACGACGAAGCCAAAG                   | 152 bp | J                 |
|           |                | CACCAATGCCAC <sup>a</sup> CCAATACG      |        |                   |
| At4g24670 | <i>TAR2</i>    | TGTGGGAATGTAACGGGCAAATC                 | 172 bp | J                 |
|           |                | CAAATG <sup>a</sup> CTGGTGTGGCTCAAAG    |        |                   |
| At4g31500 | <i>CYP83B1</i> | GACCAACCTTTCTCCATCAAATTCAC              | 176 bp | S                 |
|           |                | TCACCTATCACACTCCTCACTTCG                |        |                   |
| At4g39950 | <i>CYP79B2</i> | TGCTTACCGCCGATGAAATCAAAC                | 165 bp | S                 |
|           |                | GTCTCTCTTTCCCGACGACTCTG                 |        |                   |
| At2g22330 | <i>CYP79B3</i> | CCTTTGCTTACCGCTGATGAAATC                | 78 bp  | S                 |
|           |                | GGCGTTTGATGGGTTGTCTGG                   |        |                   |
| At2g20610 | <i>SUR1</i>    | AGGCATATCTAAGGGATGGGTTGTTC              | 143 bp | S                 |
|           |                | TTATTGTGGCAGGGTCAGGAGTTAC               |        |                   |
| At1g13980 | <i>GNOM</i>    | CTGGTAGCATCAAACAAGAG <sup>a</sup> AAAGC | 62 bp  | J                 |
|           |                | TGGTTTACTCACAATGGCATAATCAC              |        |                   |

<sup>a</sup> ^ positioned exon-exon junction, where this primer is bridged.

<sup>b</sup> J indicates that the primer was designed to bridge exon-exon junction.

<sup>c</sup> S indicates that the primer pair spanned an intron.

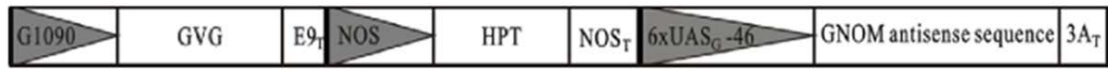

**Supplementary Figure S1.** Schematic illustration of inducible antisense vector construction

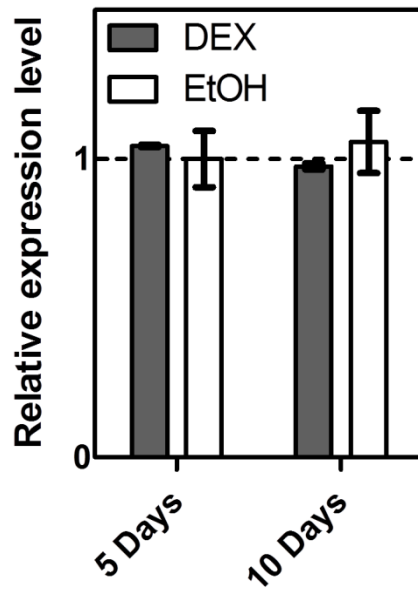

**Supplementalry Figure S2. Expression of endogenous *GNOM* mRNA in EV7 seedlings treated with DEX or EtOH by indicated time.** Each data point represents mean  $\pm$  SE from two biological repeats and two technical repeats.

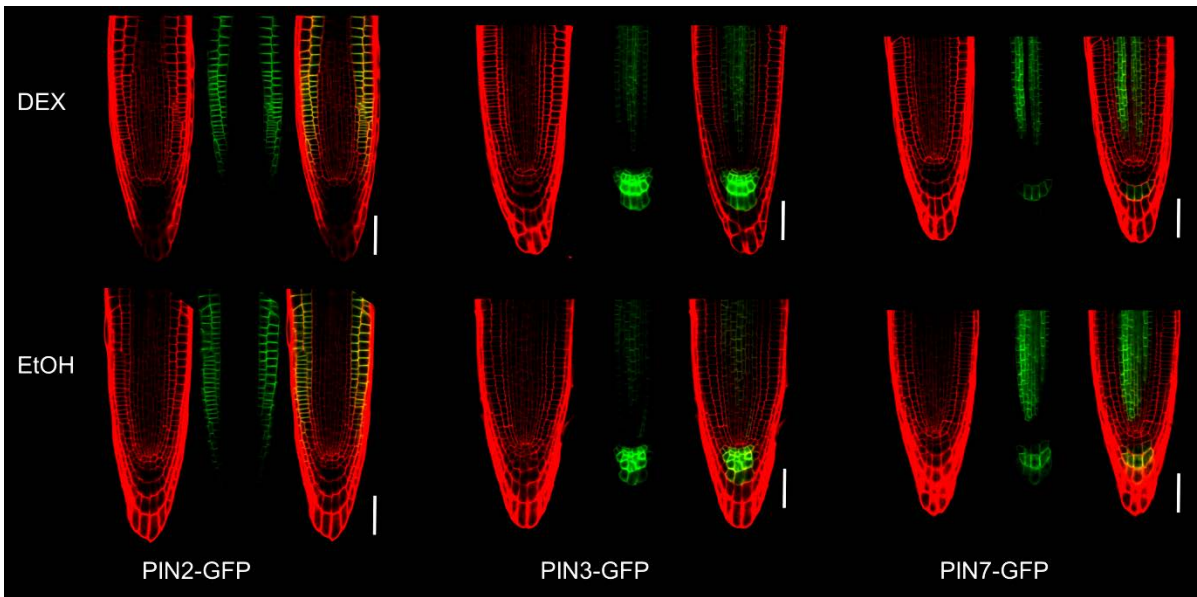

**Supplementary Figure S3. Expression and localization of other PIN family proteins in DEX or EtOH treated InAGN9 roots.** Roots were counterstained with PI (red). Scale bar: 50  $\mu\text{m}$

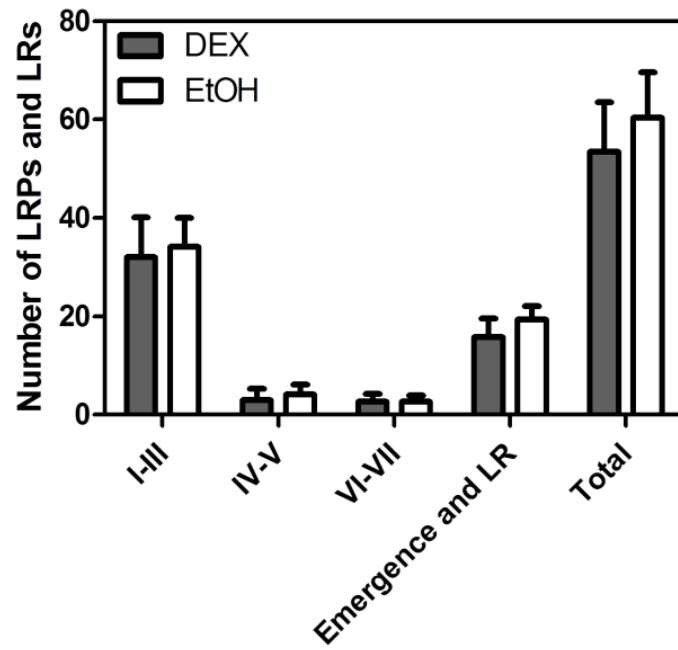

**Supplementary Figure S4. Number of lateral root primordia and lateral roots in EV7 seedlings germinated on plates containing DEX or EtOH.**

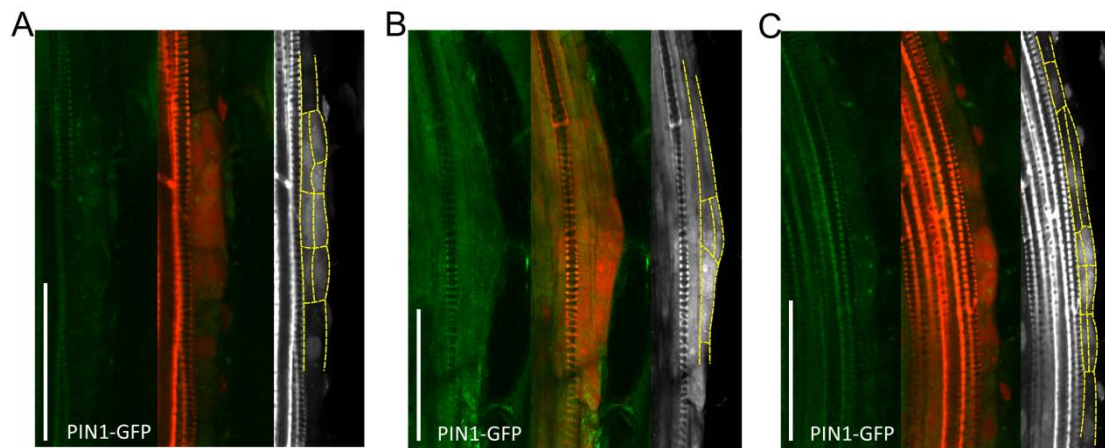

**Supplementary Figure S5. PIN1-GFP expression in three disorganized LRPs of DEX induced InAGN9 roots.** A-C showed three disorganized LRPs without PIN1-GFP expression. Yellow dotted lines delineate shape of cells in these LRPs. Scale bar: 50  $\mu$ m



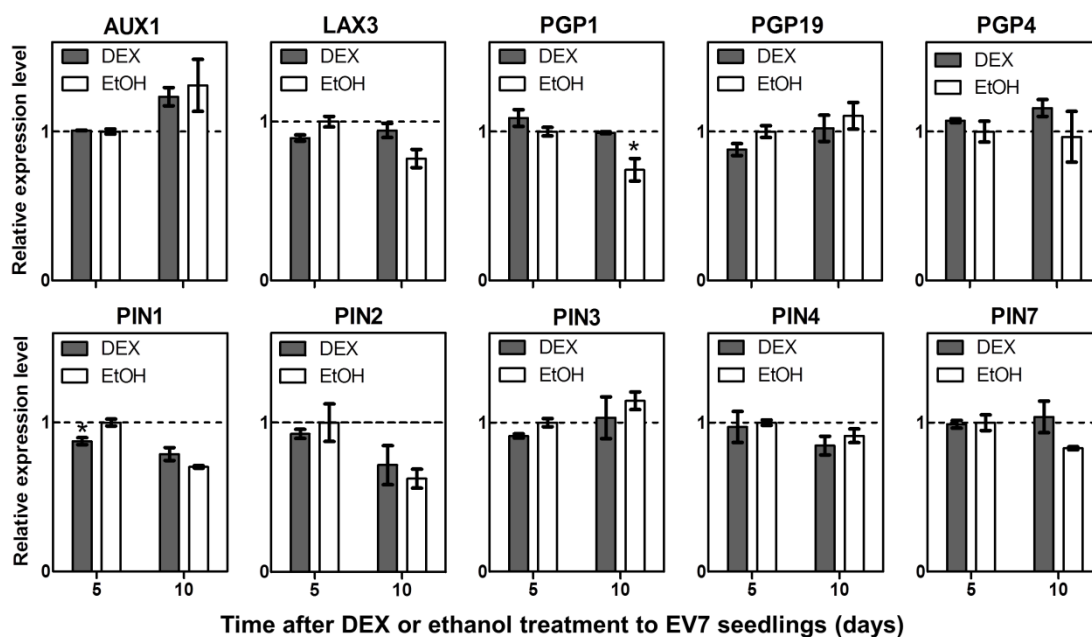

**Supplementary Figure S6. Quantitative analysis of changes in expression level of genes encoding auxin transport proteins after EV7 seedlings were induced by DEX.**

\* indicates  $p < 0.05$  (Students' *t*-test)

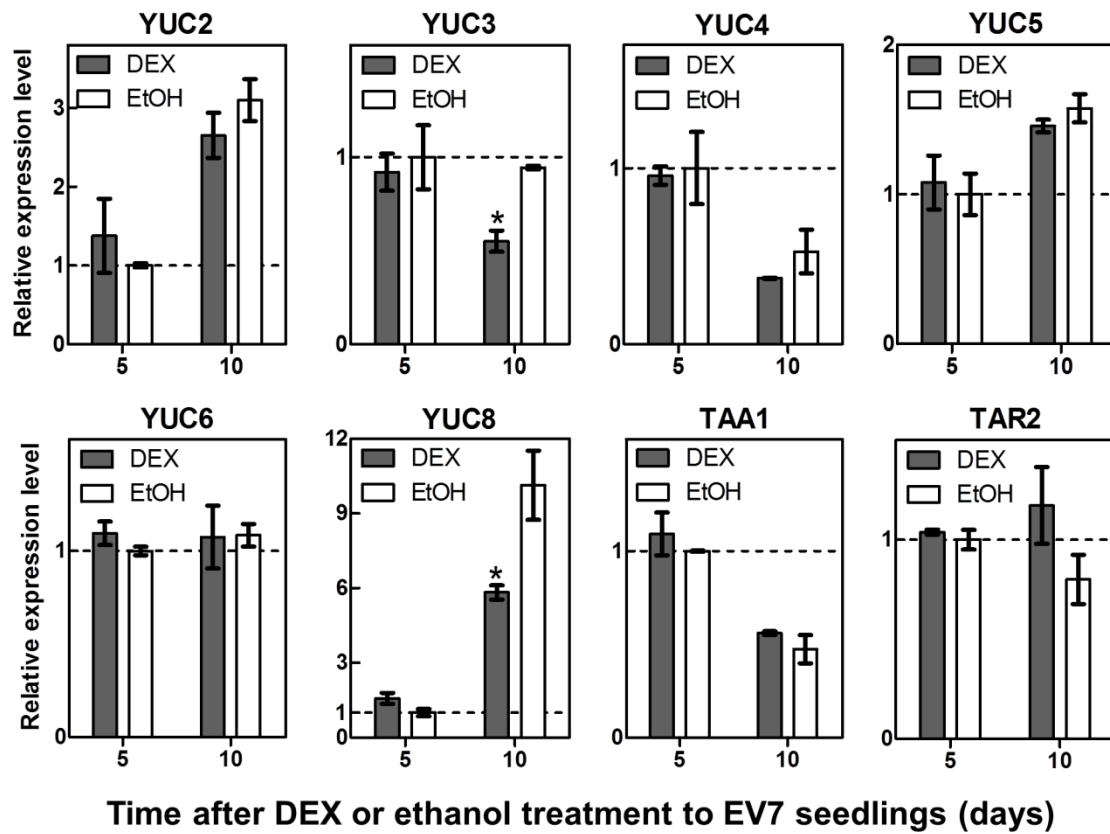

**Supplementary Figure S7. Quantitative analysis of changes in expression level of auxin synthesis genes after EV7 seedlings were induced by DEX.**

\* indicates  $p < 0.05$  (Students' *t*-test)

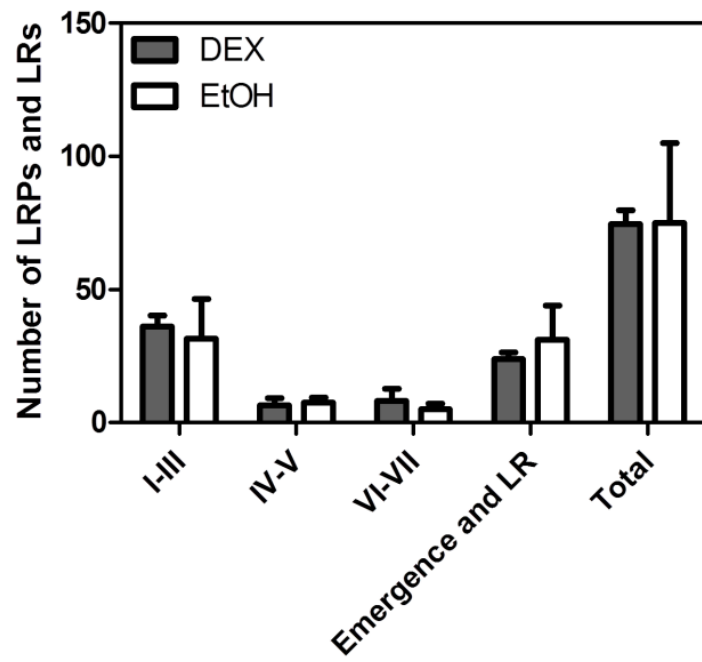

**Supplementary Figure S8. Number of lateral root primordia and lateral roots in EV7 seedlings grown on MS plates containing DEX or EtOH with 0.1 μM NAA. Data represent mean ± SD (n=10).**

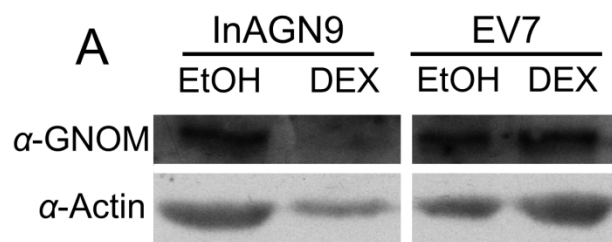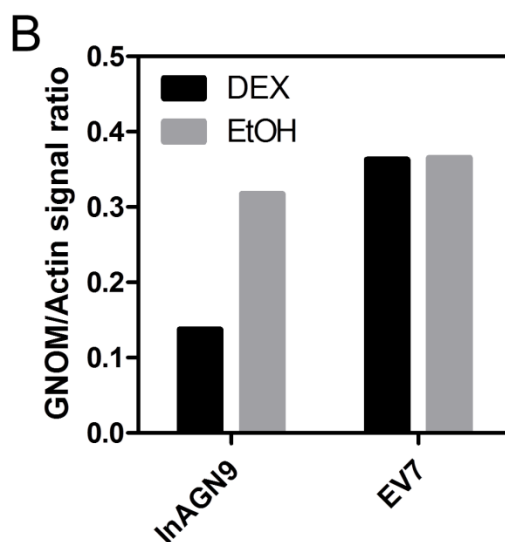

**Supplementary Figure S9. Detection of GNOM protein level in DEX treated InAGN9 and EV7 seedlings by western blotting.** (A) Total protein was extracted from InAGN9 and EV7 whole seedlings that germinated for 7 days on DEX or EtOH containing MS medium, then they were used for western blotting to detect protein expression level of GNOM and  $\beta$ -ACTIN with anti-GNOM and anti- $\beta$ -ACTIN (Santa Cruz, USA) antibodies as described [1]. (B) Quantification of signal intensity for GNOM and  $\beta$ -ACTIN expression level using Image J software ([rsbweb.nih.gov/ij/](http://rsbweb.nih.gov/ij/)). Relative protein expression level of GNOM to  $\beta$ -ACTIN was calculated as the ratio of signal intensity of GNOM to  $\beta$ -ACTIN.

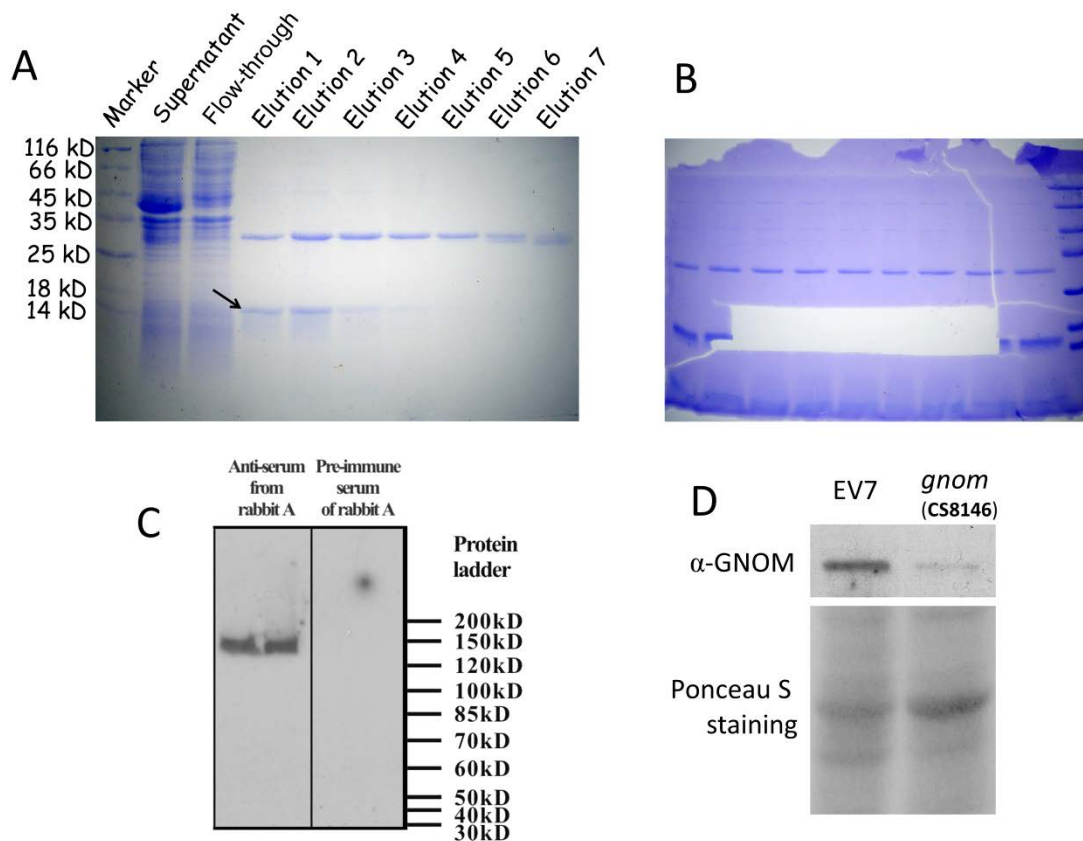

**Supplementary Figure S10. Production of rabbit anti-GNOM polyclonal antibody.**

(A) Expression and purification of GNOM fragment. Arrow indicated purified GNOM protein fragment. For construction of expression vector pMXB10-GNexp, 1734bp to 2198bp of GNOM coding sequence was amplified from a whole seedling cDNA library and was cloned in-frame into pMXB10 (NEB) using Nde I and Xho I sites. The plasmid was transformed into E. coli. Strain BL21 (DE3) and recombinant protein was induced and purified according to manual of IMPACT system (NEB, <https://www.neb.com/~media/Catalog/All-Products/21A73B351DD24F94BC584FAED2A83A0F/Datacards%20or%20Manuals/manualE6901.pdf>). (B) Target protein was cut from the polyacrylamide gel after staining with CuCl<sub>2</sub>, the cutting was confirmed after staining the remaining part of gel by Coomassie blue R250 as described [1]. The cut gel with target protein fragment was used to produce antibody in rabbits as described [1]. (C) Produced antiserum in rabbit could detect a single band (approximate 150kDa) in proteins from wild type Arabidopsis seedlings, while the pre-immune serum failed to detect any signals. (D) The

specificity of the antiserum was confirmed using proteins from *agnom* mutant (ABRC number: CS8146. As described by Busch [2], this EMS-mutagenized mutant has a point mutation, which produce a premature stop codon at AA647.), because it failed to detect a strong 150kDa band in the mutant protein compared with that of EV7 transgenic line.

## References

1. Wang, L., et al., *NtGNLI is involved in embryonic cell division patterning, root elongation, and pollen tube growth in tobacco*. New Phytol, 2008. **179**(1): p. 81-93.
2. Busch, M., U. Mayer, and G. Jurgens, *Molecular analysis of the Arabidopsis pattern formation of gene GNOM: gene structure and intragenic complementation*. Mol Gen Genet, 1996. **250**(6): p. 681-91.
